# Supplementary material
Source: HighWire-hosted journal article supplement (https://jmg.bmj.com/content/jmg-2022-108734)
Supplement: inline-supplementary-material-3 [file inline-supplementary-material-3.pdf]

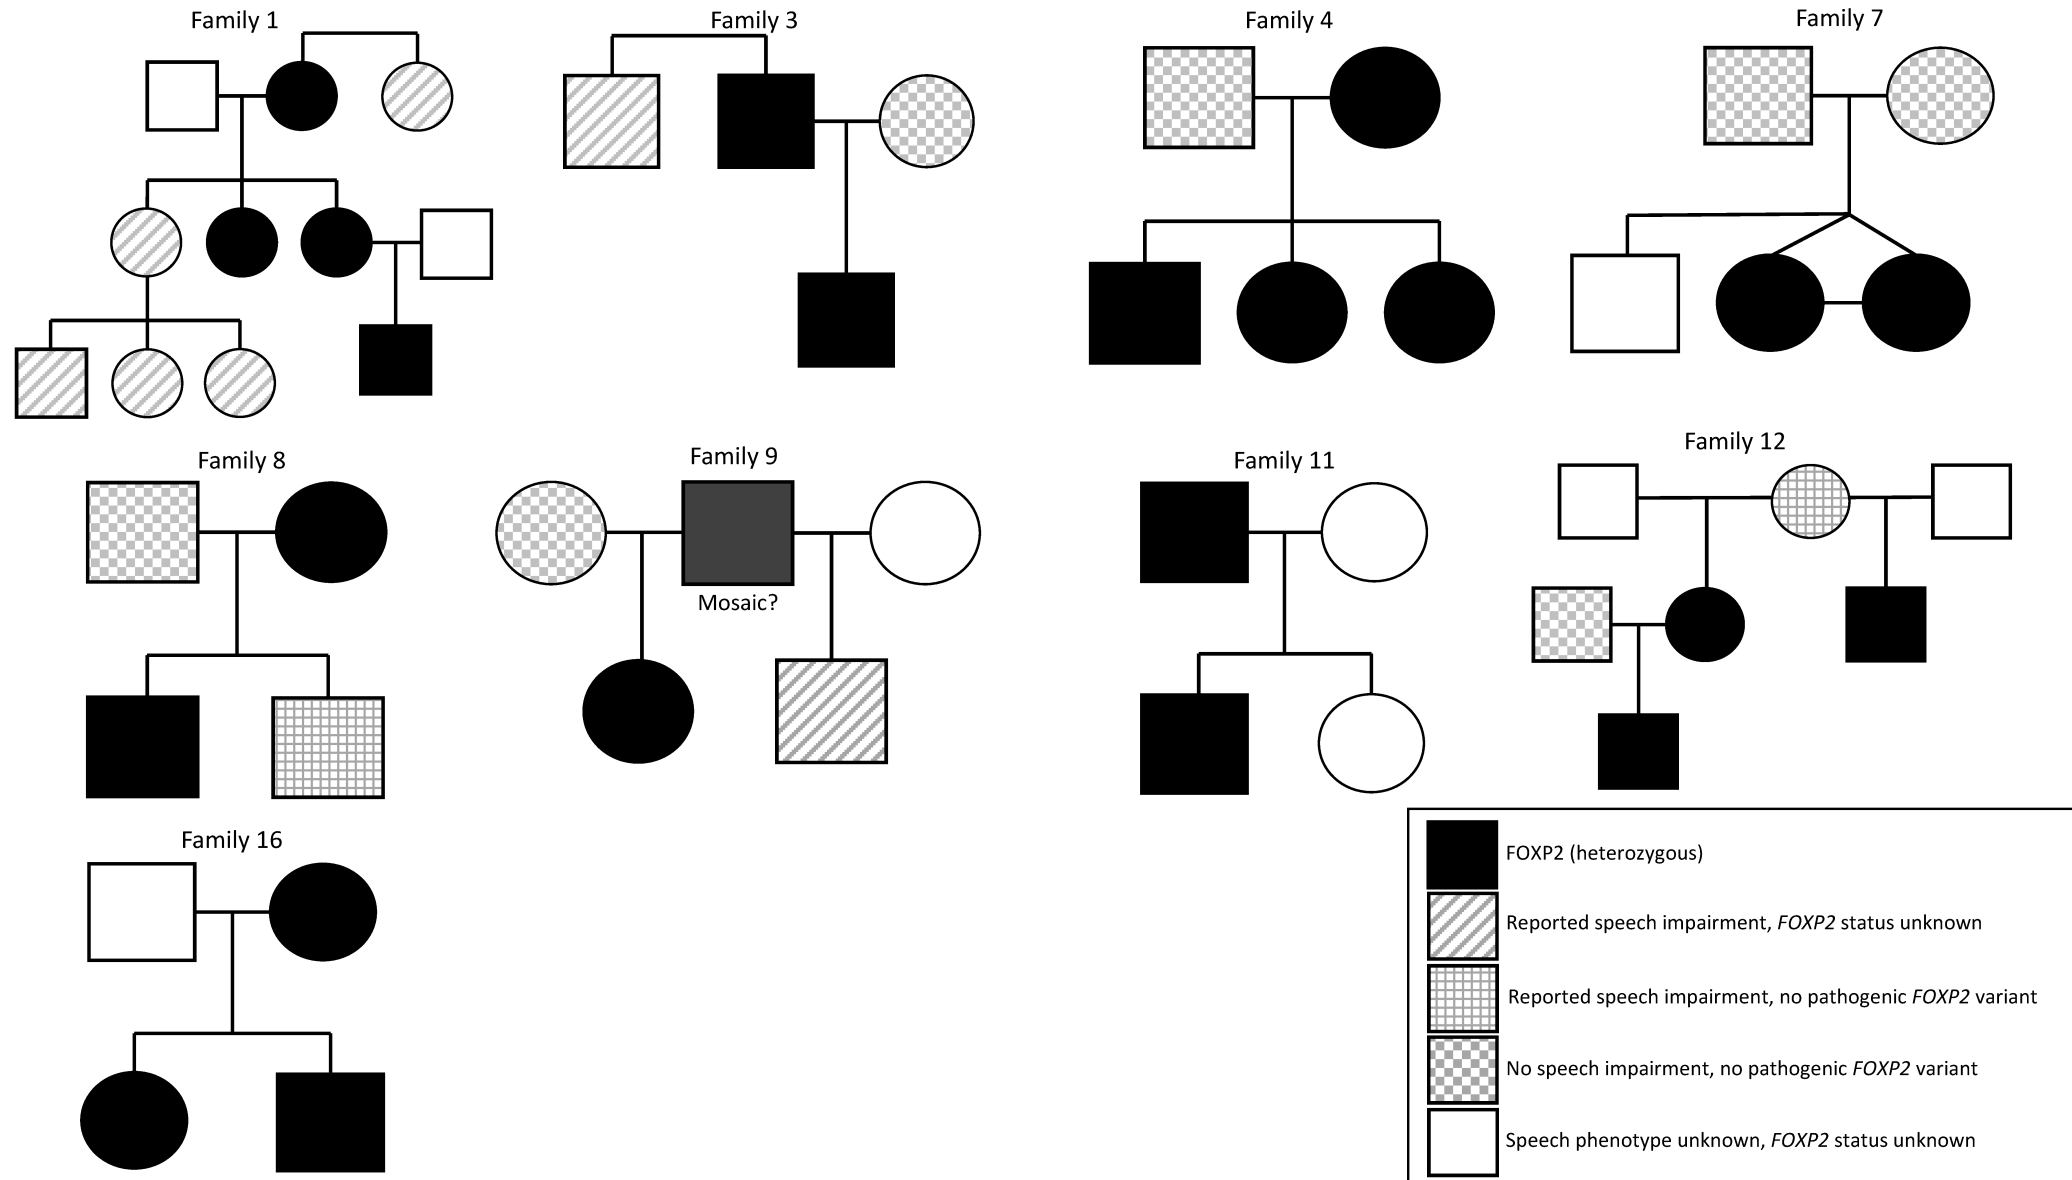

**Supplementary Figure 1.** Family pedigrees of inherited cases of pathogenic missense/loss-of-function variants disrupting *FOXP2*
